# Supplementary material for: Non-invasive force measurement reveals the number of active kinesins on a synaptic vesicle precursor in axonal transport regulated by ARL-8
Source: Royal Society of Chemistry journal article supplement (doi:10.1039/c7cp05890j), 2018-01-01
Supplement: c7cp05890j2.pdf [file c7cp05890j2.pdf]

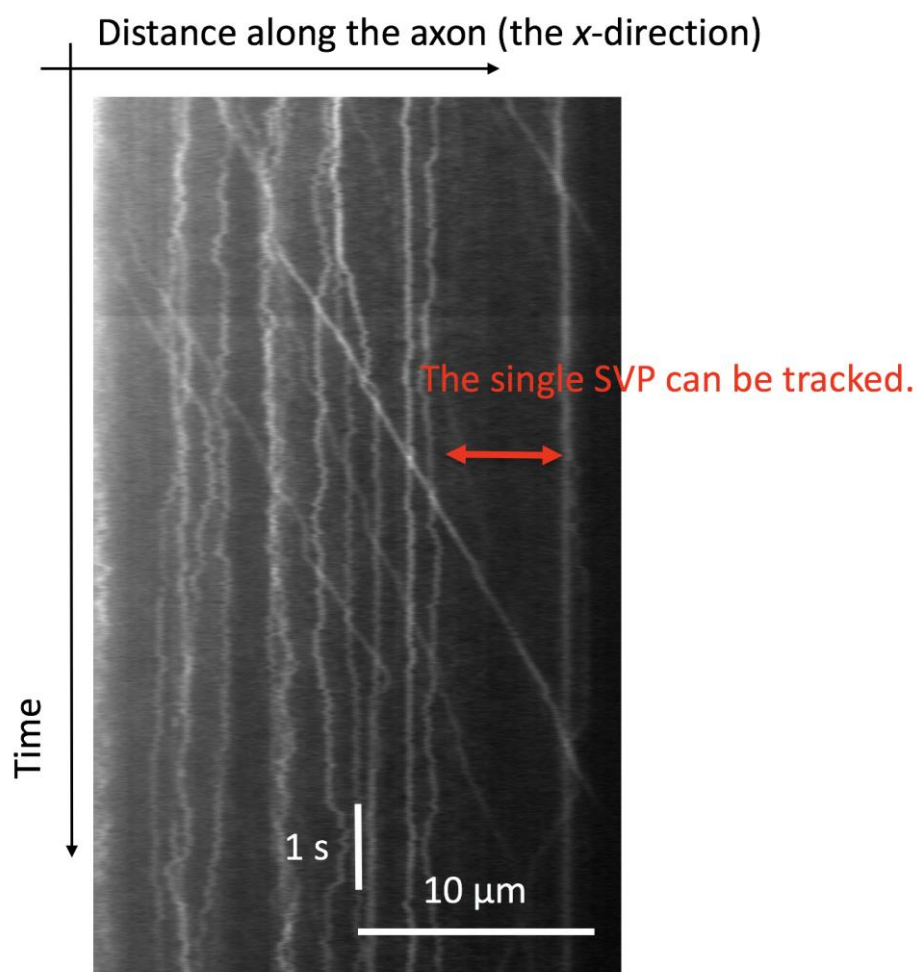

**Fig. S1 Kymograph for SVPs.** There were many SVPs in axons. The kymograph represents the motion of SVPs along the direction of the axon as a function of time. Each bright line represents the motion of a SVP. Several SVPs moved anterogradely. There were time intervals that the single SVP could be tracked (*e.g.*, the red arrows) even though the axon was clouded with many SVPs. We investigated such rare time intervals.

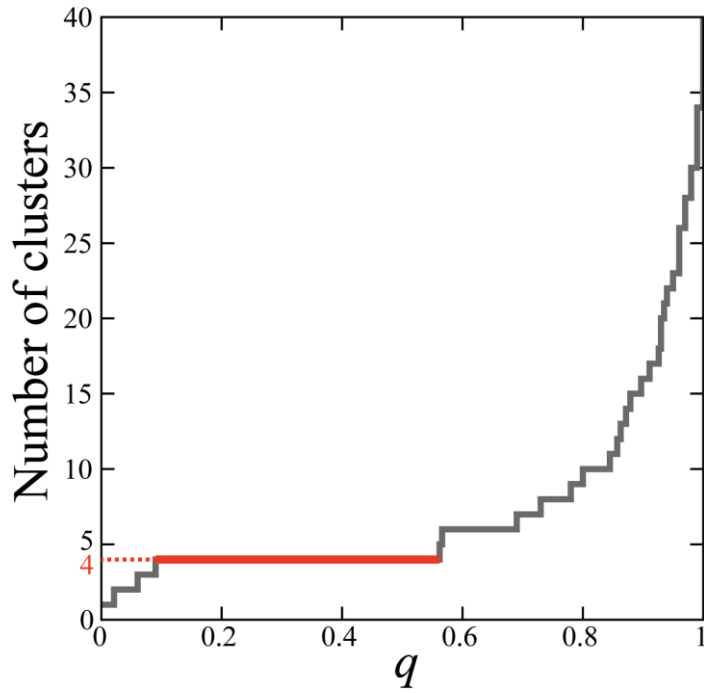

**Fig. S2 Stability of the clustering analysis (Affinity propagation).** The effect of the parameter  $q$ , which controls the input preference of the affinity propagation method<sup>18</sup>, on the result (the number of clusters). It is known that the value  $q=0.5$  results in a modulate number of clusters in general<sup>18</sup>. It was seen that the cluster number was stable for the wide range of  $q$  for our experimental data (Fig. 3).

(a)

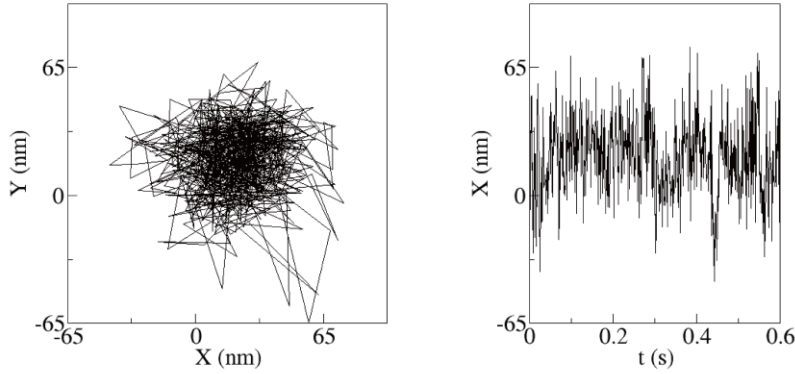

(b)

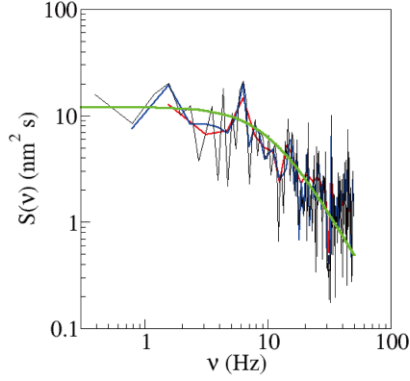

(c)

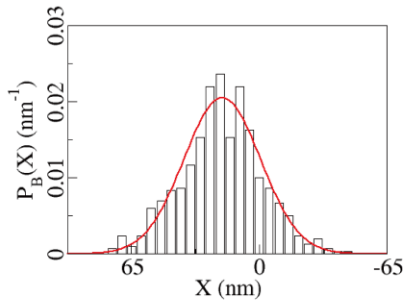

**Fig. S3 Force calibration.** (a) The position ( $X$ ,  $Y$ ) of a paused synaptic vesicle precursor (SVP) (left). The  $x$ -direction is the direction of motion of transported SVPs.  $X(t)$  as a function of time is plotted (right). (b) The power spectrum of the position  $X(t)$  in the cases  $N_w=64$  (red), 128 (blue) and 256 (black), respectively ( $N_w$  is the window of the Fourier transform). It was fitted by the Lorentzian  $c/(1 + (\Gamma/k \cdot v)^2)$  (green), where  $c$  is a constant. (c) The probability distribution,  $P_B(X)$ , of  $X$ . It was fitted by the Boltzmann distribution  $P_B(X) = (k/2\pi k_B T)^{0.5} \exp(-k(X - X_a)^2/2k_B T)$ .
